# Supplementary material for: Oridonin Protects against Myocardial Ischemia–Reperfusion Injury by Inhibiting GSDMD-Mediated Pyroptosis
Source: MDPI journal article supplement (doi:10.3390/genes13112133), 2022-11-17
Supplement: s1 [file s1]

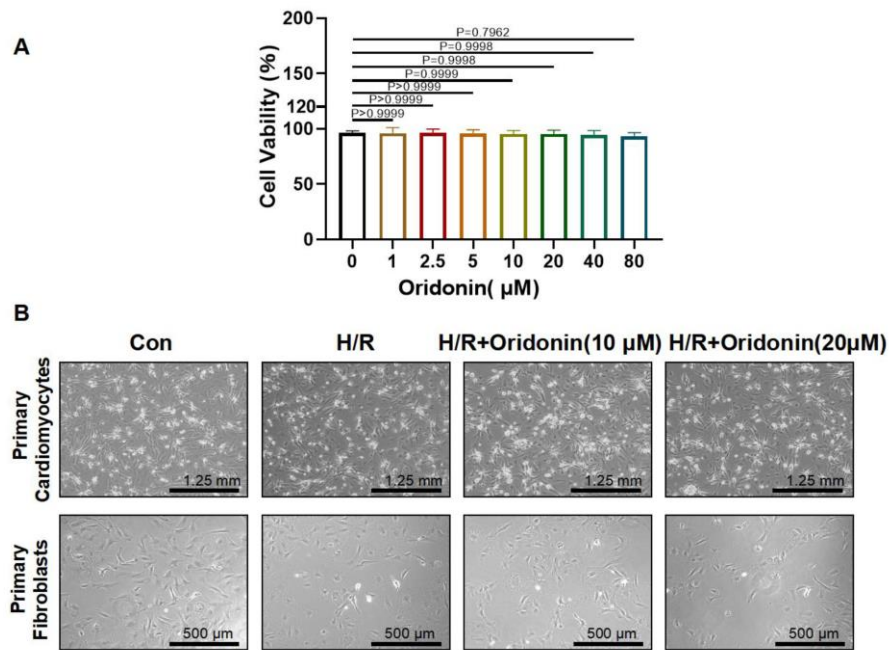

**Figure S1:** Oridonin reduced cardiomyocyte damage but not fibroblast damage during cardiac infarction. **(A)** The safe concentration of oridonin in NRCMs. **(B)** Images of NRCMs and primary fibroblasts from each group. All samples were obtained from Sprague–Dawley rats. In all cases, the data are expressed as the mean  $\pm$  SD.
